# Supplementary material for: Co-developing a theory of change for a personalised multimodal cancer prehabilitation programme in South Wales
Source: PubMed Central journal article supplement — BMC Health Serv Res. 2024 Dec 2;24:1525. doi: 10.1186/s12913-024-11964-3 (PMC11613770; doi:10.1186/s12913-024-11964-3), 2024-12-02
Supplement: 12913_2024_11964_MOESM1_ESM.pdf [file 12913_2024_11964_MOESM1_ESM.pdf]

### Prehab2Rehab Table of Indicators

| Outcomes<br>(Pre-Treatment)                                                                                                                      | Suggested Indicator                                                                                                                                        |
|--------------------------------------------------------------------------------------------------------------------------------------------------|------------------------------------------------------------------------------------------------------------------------------------------------------------|
| Participants engage with programme                                                                                                               | Attendance rates at Prehab2Rehab delivered or referred sessions (e.g. therapy, physical activity, dietitian)                                               |
| Participants are aware of, and understand the benefits of modifying behaviour on oncological treatment outcomes and post-treatment complications | Changes in knowledge, attitudes and beliefs as they pertain to modifiable risk factors that affect response cancer treatment.                              |
| Improved confidence in managing their cancer diagnosis and increased uptake of actions to improve health/lifestyle                               | Changes in self-management of cancer diagnosis (e.g. changes in healthy lifestyle practices).                                                              |
| Improved knowledge of benefits of healthy lifestyle options for suspected cancer                                                                 | Changes in knowledge about healthy lifestyle options                                                                                                       |
| Participant increases their skills to enable them to participate in physical activity, improve their nutrition, or improve wellbeing             | Changes in skills base needed to improve lifestyle, based on Prehab2Rehab sessions received                                                                |
| Regular participation in physical activity, nutrition, and/or wellbeing sessions                                                                 | Number of referred sessions attended by participants, number of missed appointments, dropout rates and the facilitators and barriers to participating      |
| Participants are aware of how to resume activities following treatment and/or the services available to them                                     | Changes in knowledge about resuming exercise; attendance rates at post treatment rehabilitation interventions and barriers and facilitators to attendance. |
| Increased wellbeing/resilience and reduced anxiety prior to treatment                                                                            | Changes in levels of wellbeing (WEMWBS), anxiety (GAD-7) and depression (PHQ-9)                                                                            |

| Outcomes<br>(Post-Treatment)                                                                 | Suggested Indicator                                                                                                                                                              |
|----------------------------------------------------------------------------------------------|----------------------------------------------------------------------------------------------------------------------------------------------------------------------------------|
| Patient has good physical treatment outcomes (e.g. improved fitness, functional capacity)    | Changes in levels of muscle strength (handgrip test), functional capacity (6-minute walk and sit to stand tests) and physical activity (levels compared to WHO recommendations). |
| Patient has good psychological treatment outcomes (e.g. reduced anxiety, improved wellbeing) | Changes in levels of wellbeing (WEMWBS), anxiety (GAD-7) and depression (PHQ-9)                                                                                                  |
| Reduced post-treatment complications                                                         | % change or difference in post-operative complications between patients who undergo P2R and those who do not                                                                     |
| Improved comorbidity management and optimisations of lifestyle and fitness                   | Changes to the numbers of comorbidities of patients who receive P2R and those who do not                                                                                         |

| Outcomes<br>(Released/Finished Treatment to 1 Year)                                                                                             | Suggested Indicator                                                                                                                                                                                |
|-------------------------------------------------------------------------------------------------------------------------------------------------|----------------------------------------------------------------------------------------------------------------------------------------------------------------------------------------------------|
| Reduced recovery time, bed days, readmissions                                                                                                   | Decrease in length of stay in hospital post-surgery<br>Reduced rate of readmission within 30 days                                                                                                  |
| Improved survival                                                                                                                               | Increased survival rate for treated patients                                                                                                                                                       |
| Increased wellbeing/mental resilience. Enhanced quality of life/overall well-being (e.g. decreased anxiety, depression, and emotional distress) | Increase in % of prehab participants reporting improved wellbeing and mental resilience<br><br>Prehab participants have greater improvements to anxiety, depression, and emotional distress scores |
| Maintenance of healthy lifestyle adopted from prehab programme, e.g. physical activity, nutrition, smoking cessation                            | Increase in number reporting maintenance of healthy lifestyle                                                                                                                                      |
