# Supplementary figures and images for: Co-developing a theory of change for a personalised multimodal cancer prehabilitation programme in South Wales
Source: PubMed Central journal article supplement — BMC Health Serv Res. 2024 Dec 2;24:1525. doi: 10.1186/s12913-024-11964-3 (PMC11613770; doi:10.1186/s12913-024-11964-3), 2024-12-02

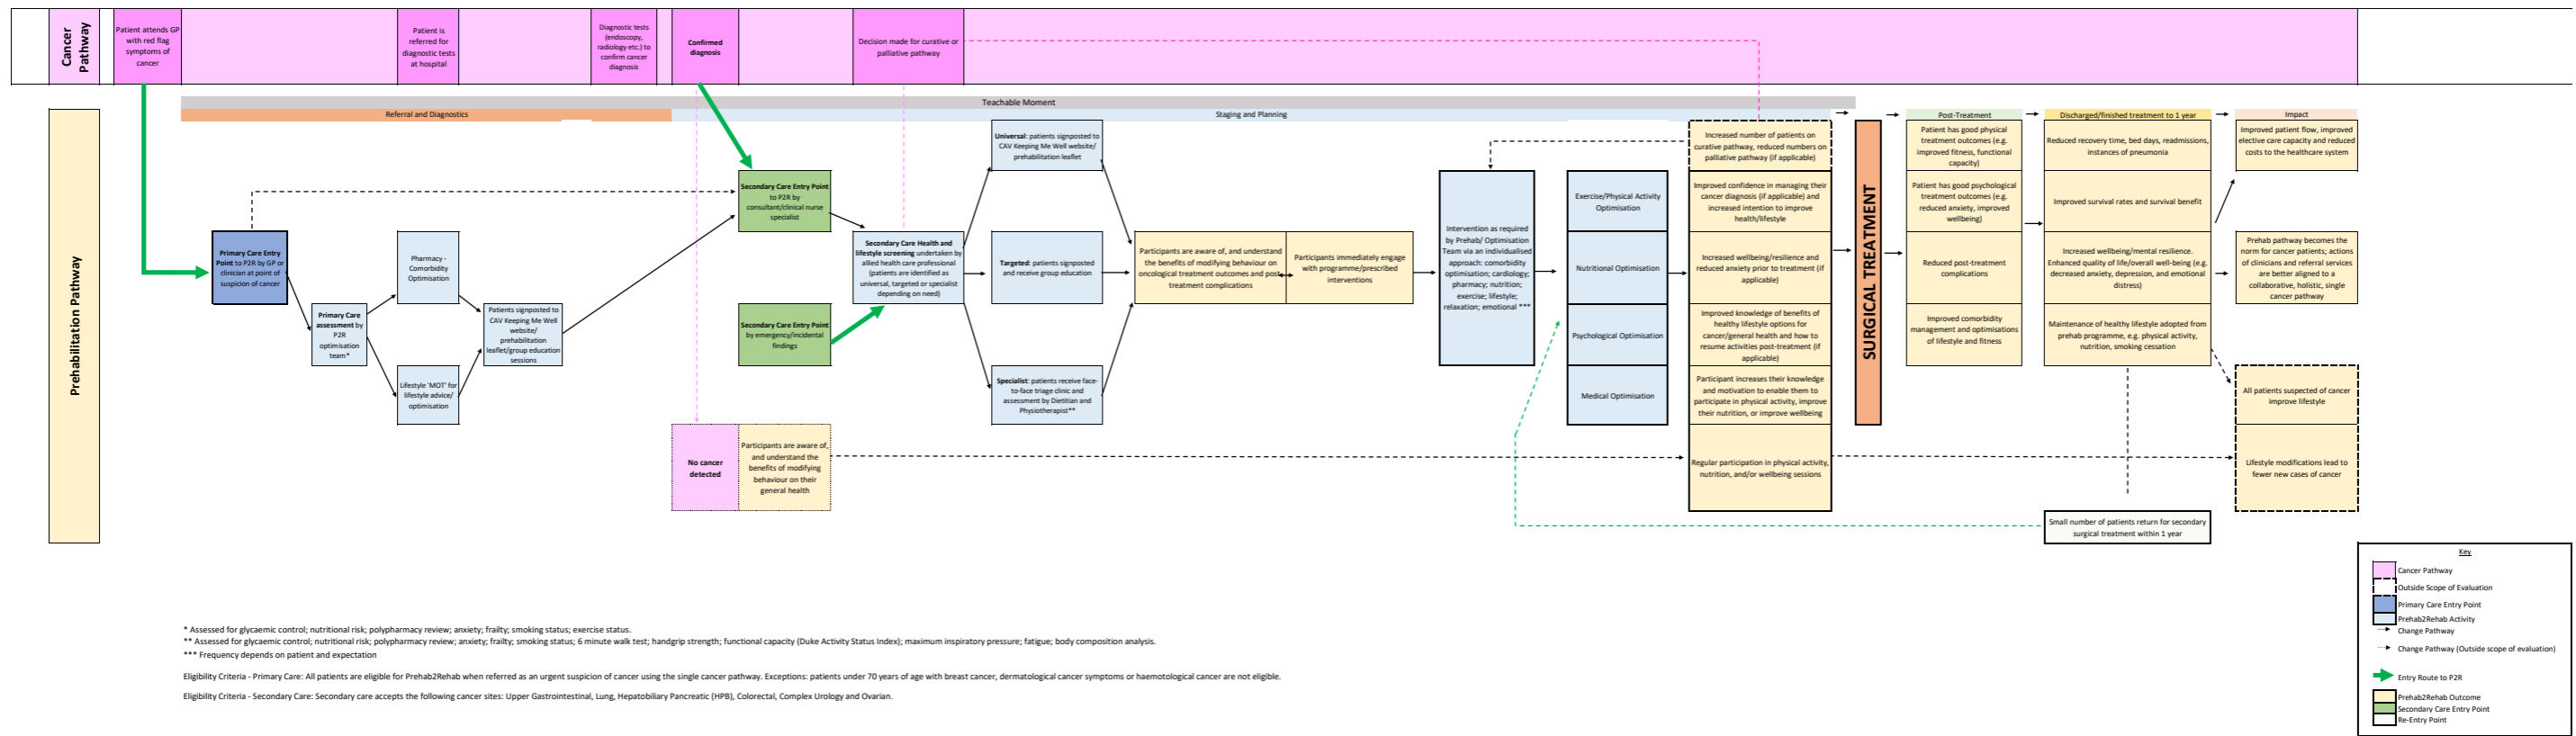

Supplement: 12913_2024_11964_MOESM2_ESM.pdf [file 12913_2024_11964_MOESM2_ESM.pdf]
